# Supplementary material for: NiAg0.4 3D porous nanoclusters with epitaxial interfaces exhibiting Pt like activity towards hydrogen evolution in alkaline medium
Source: Royal Society of Chemistry journal article supplement (doi:10.1039/d0nr00993h), 2020-01-01
Supplement: d0nr00993h1.pdf [file d0nr00993h1.pdf]

## Supporting Information

# **NiAg<sub>0.4</sub> 3D porous nanoclusters with epitaxial interfaces exhibiting Pt like activity towards hydrogen evolution in alkaline medium**

Chidanand Hegde,<sup>‡a</sup> Xiaoli Sun,<sup>‡b</sup> Hao Ren,<sup>c</sup> Aijian Huang,<sup>d</sup> Daobin Liu,<sup>c</sup> Bing Li,<sup>e</sup> Raksha Dangol,<sup>c</sup> Chuntai Liu,<sup>f</sup> Shuiqing Li,<sup>\*b</sup> Hua Li<sup>\*a</sup> and Qingyu Yan<sup>\*c</sup>

<sup>a</sup>Singapore Center for 3D Printing, Department of Mechanical and Aerospace Engineering, Nanyang Technological University, Singapore 639798, Singapore

<sup>b</sup>Department of Energy and Power Engineering, Tsinghua University, Beijing, 100084, China

<sup>c</sup>Department of Materials Science and Engineering, Nanyang Technological University, Singapore 639798, Singapore

<sup>d</sup>School of Electronics Science and Engineering, University of Electronic Science and Technology of China, Chengdu, 610054, P.R. China

<sup>e</sup>Institute of Materials Research and Engineering, A\*STAR (Agency for Science, Technology, and Research), 2 Fusionopolis Way Innovis #08-03, Singapore 138634, Singapore

<sup>f</sup>Key Laboratory of Materials Processing and Mold, Ministry of Education, Zhengzhou University, Zhengzhou 450002, China

\*Corresponding authors.

E-mail addresses: [alexyan@ntu.edu.sg](mailto:alexyan@ntu.edu.sg) (Q. Yan), [lishuiqing@mail.tsinghua.edu.cn](mailto:lishuiqing@mail.tsinghua.edu.cn) (S. Li), [lihua@ntu.edu.sg](mailto:lihua@ntu.edu.sg) (H. Li).

<sup>‡</sup>These authors contributed equally.

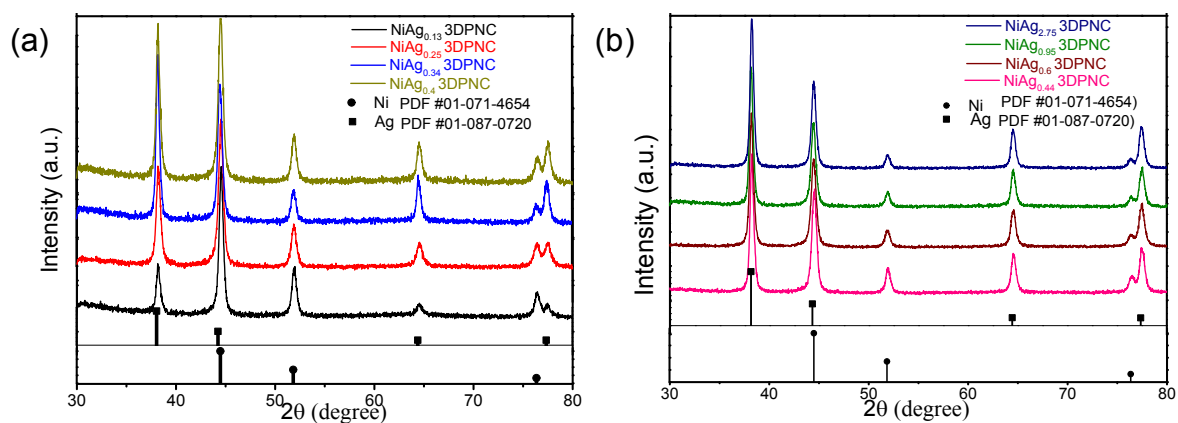

**Fig. S1** XRD patterns of (a) NiAg<sub>0.13</sub> 3DPNC, NiAg<sub>0.25</sub> 3DPNC, NiAg<sub>0.34</sub> 3DPNC, and NiAg<sub>0.4</sub> 3DPNC, and (b) NiAg<sub>0.44</sub> 3DPNC, NiAg<sub>0.6</sub> 3DPNC, NiAg<sub>0.95</sub> 3DPNC, and NiAg<sub>2.75</sub> 3DPNC.

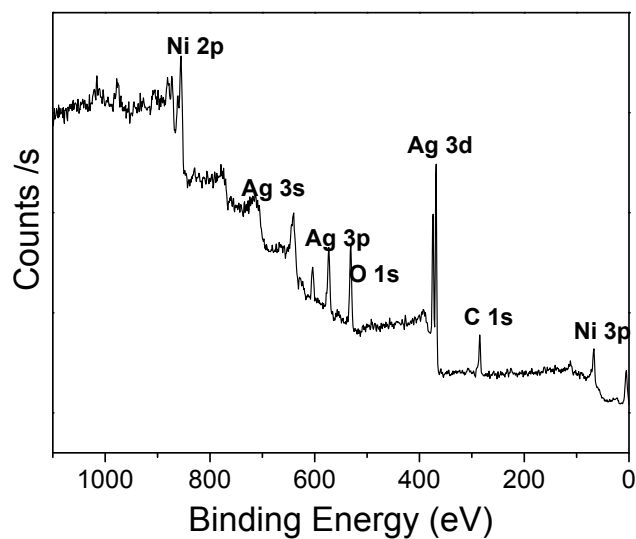

**Fig. S2** XPS survey spectrum of NiAg<sub>0.4</sub> 3DPNC.

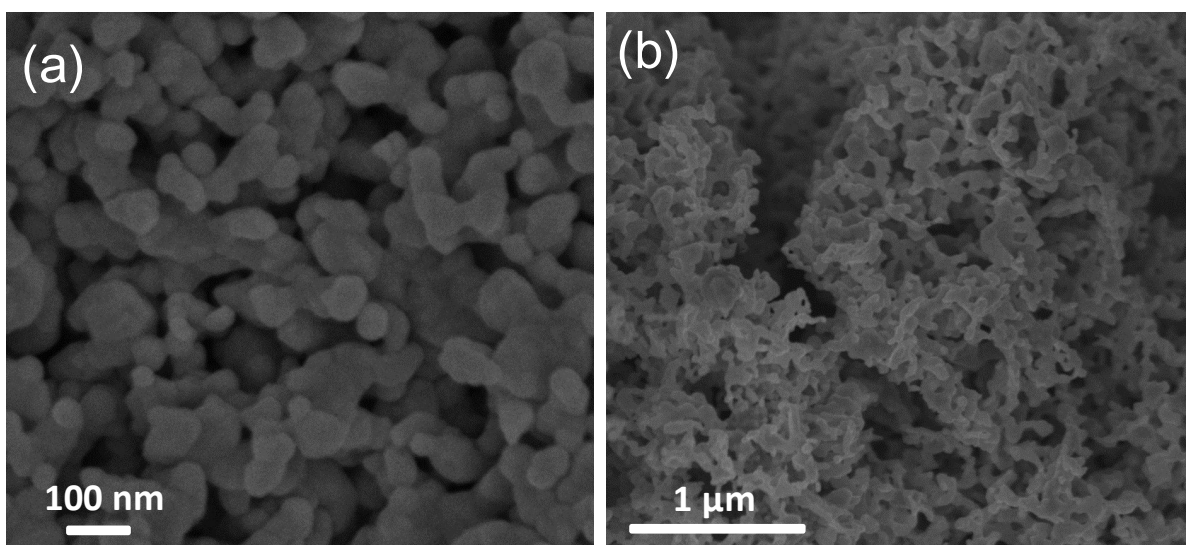

**Fig. S3** FESEM images of (a) Ag NPs, (b) Ni 3DPNC.

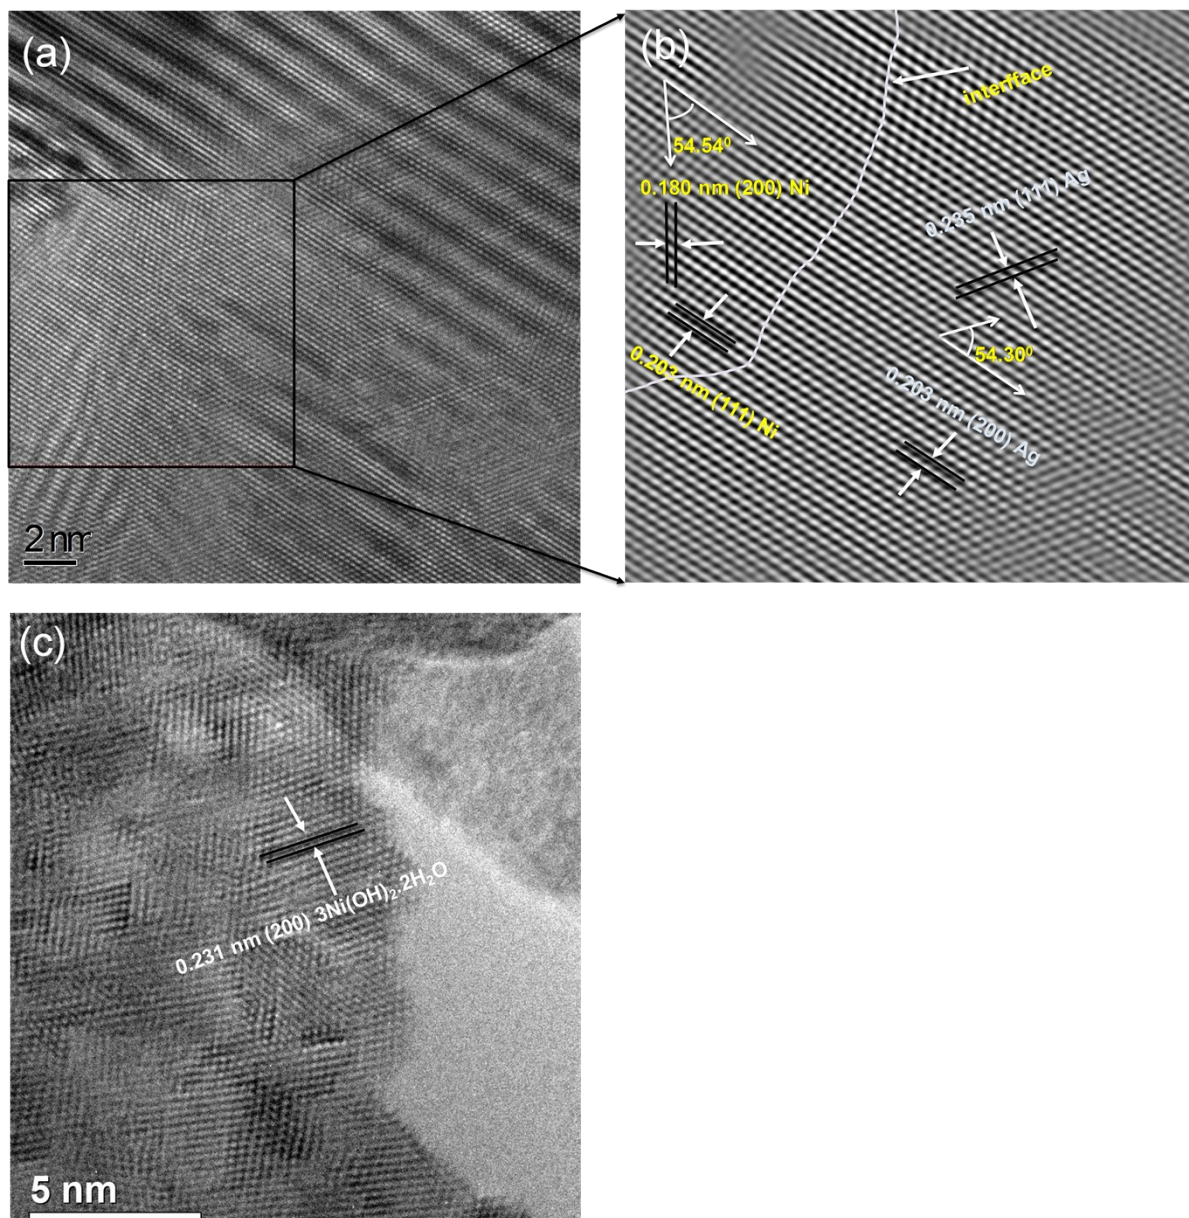

**Fig. S4** HRTEM image of (a) NiAg<sub>0.4</sub> 3DPNC, (b) FFT analyzed image of NiAg<sub>0.4</sub> 3DPNC, and (c) HRTEM image of Ag/Ni(OH)<sub>2</sub>·2/3H<sub>2</sub>O precursor.

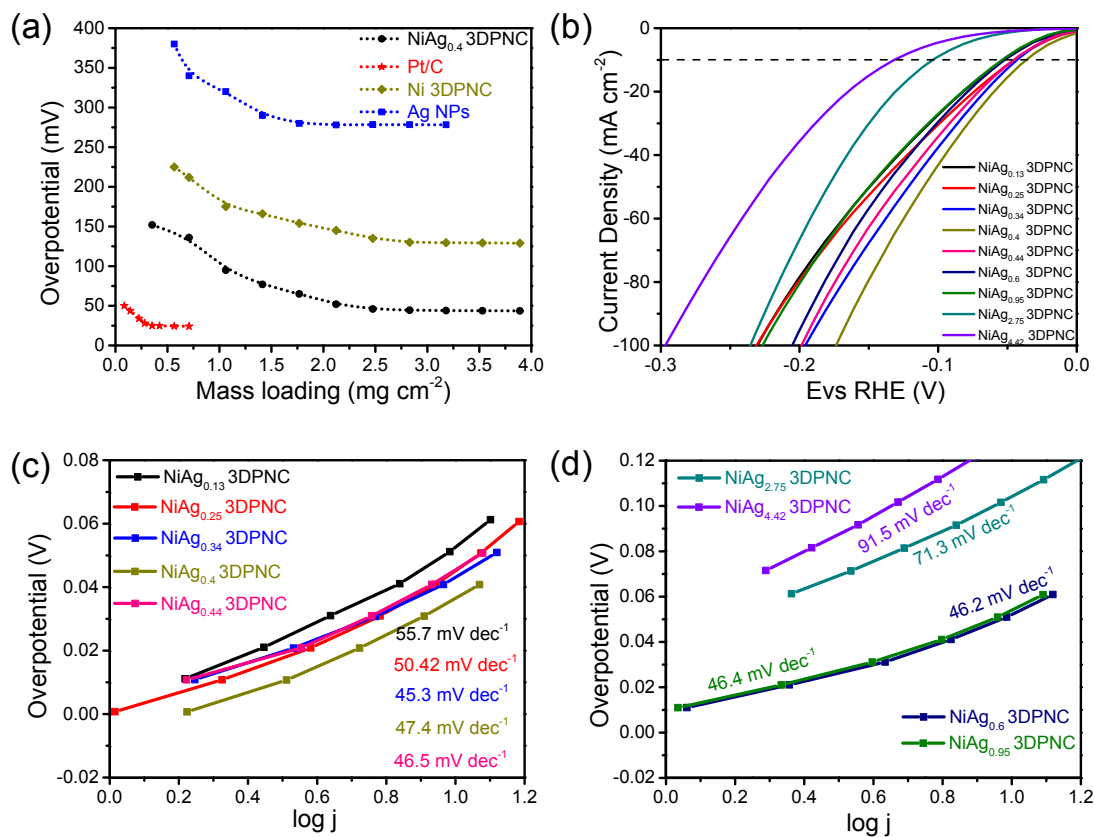

**Fig. S5** (a) Variation of overpotential with catalyst loading for Ni 3DPNC, Ag NPs,  $\text{NiAg}_{0.4}$  3DPNC, and Pt/C catalysts. (b) HER polarization curves of  $\text{NiAg}_x$  3DPNC with varying Ni to Ag ratios without iR correction and their corresponding (c-d) Tafel plots.

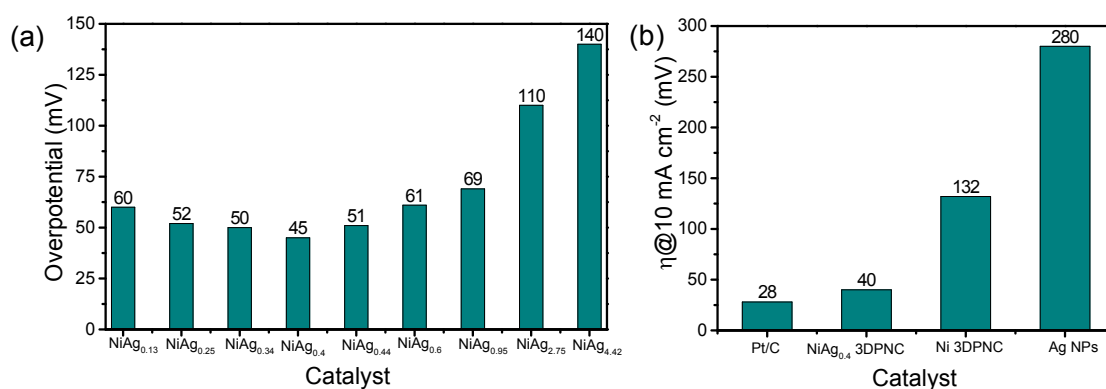

**Fig. S6** Variation of overpotential at 10 mA cm<sup>-2</sup> for (a) synthesized catalysts with varying Ag composition, (b) Pt/C, NiAg<sub>0.4</sub> 3DPNC, Ni 3DPNC and Ag NPs.

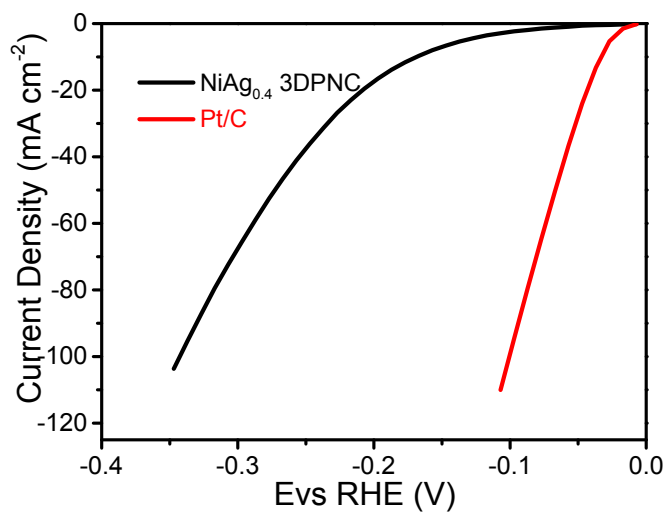

**Fig. S7** HER polarization curves for NiAg<sub>0.4</sub> 3DPNC and Pt/C in 0.5 M H<sub>2</sub>SO<sub>4</sub>.

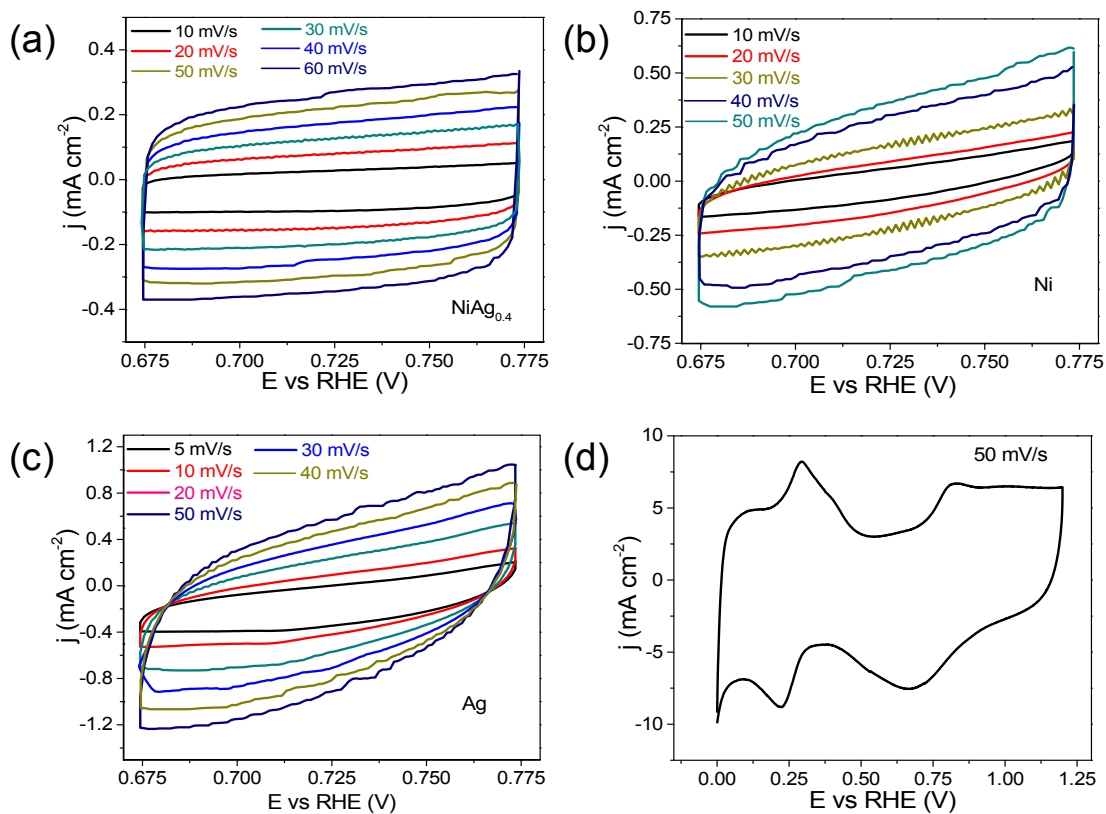

**Fig. S8** Cyclic voltammogram (CV) curves for (a) NiAg<sub>0.4</sub> 3DPNC, (b) Ni 3DPNC, (c) Ag NPs, and (d) CV curve for underpotential deposition for Pt/C 20% wt. catalyst.



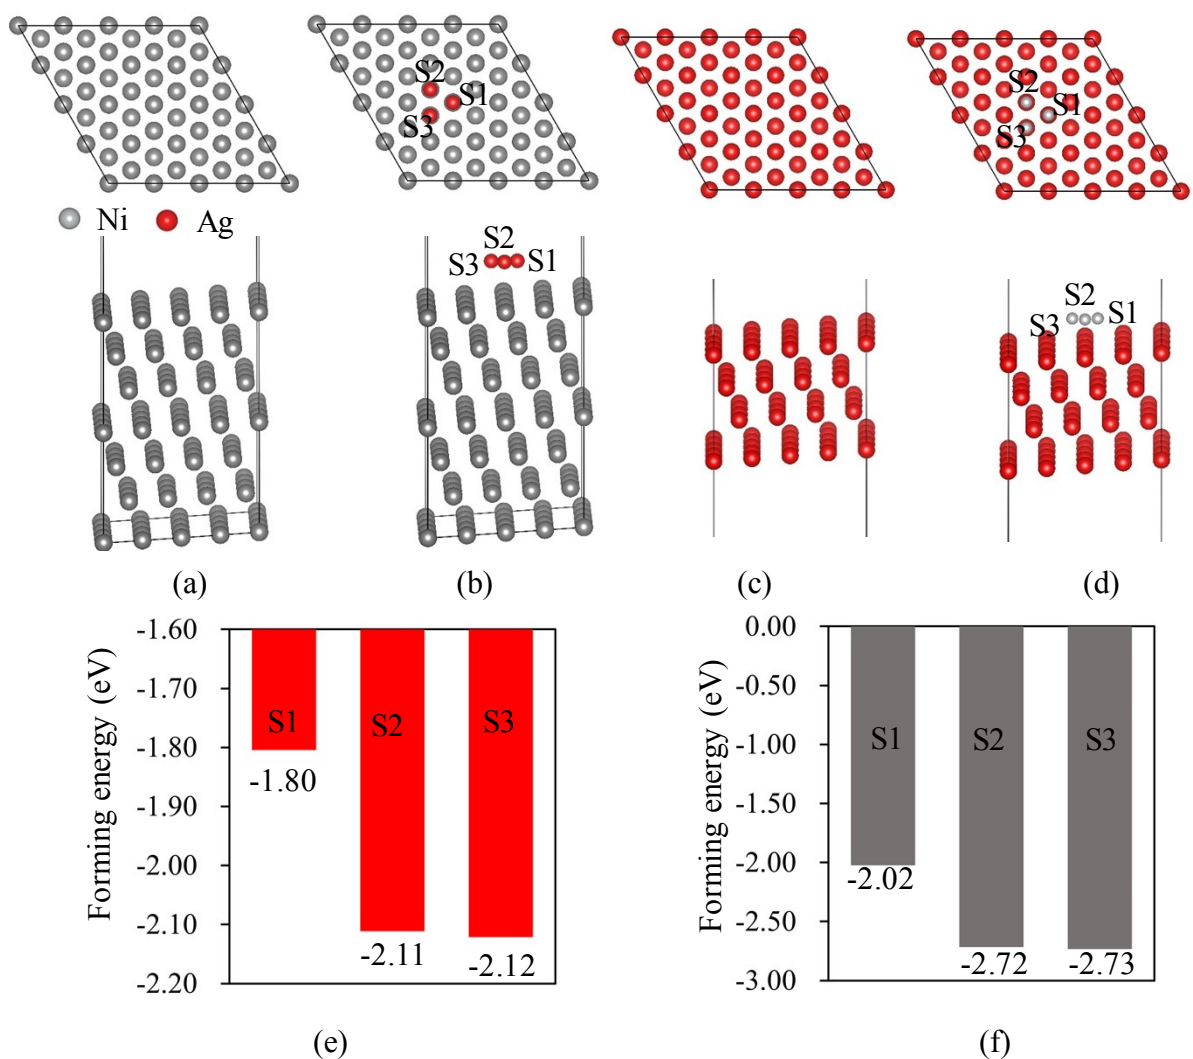

**Fig. S9** The top and side view of crystal structures of: (a) pristine Ni (111) surface, (b) Ag/Ni (111) surface where the adsorption sites: top of Ni (S1), the Ni fcc sites (S2) and Ni hcp sites (S3); the top and side view of crystal structures of (c) pristine Ag (111) surface, (b) Ni/Ag (111) surface where the adsorption sites: top of Ag (S1), the Ag fcc sites (S2) and Ag hcp sites (S3); (e) the forming energy of Ag adsorbed on Ni (111) surface; (f) the forming energy of Ni adsorbed on Ag(111) surface.



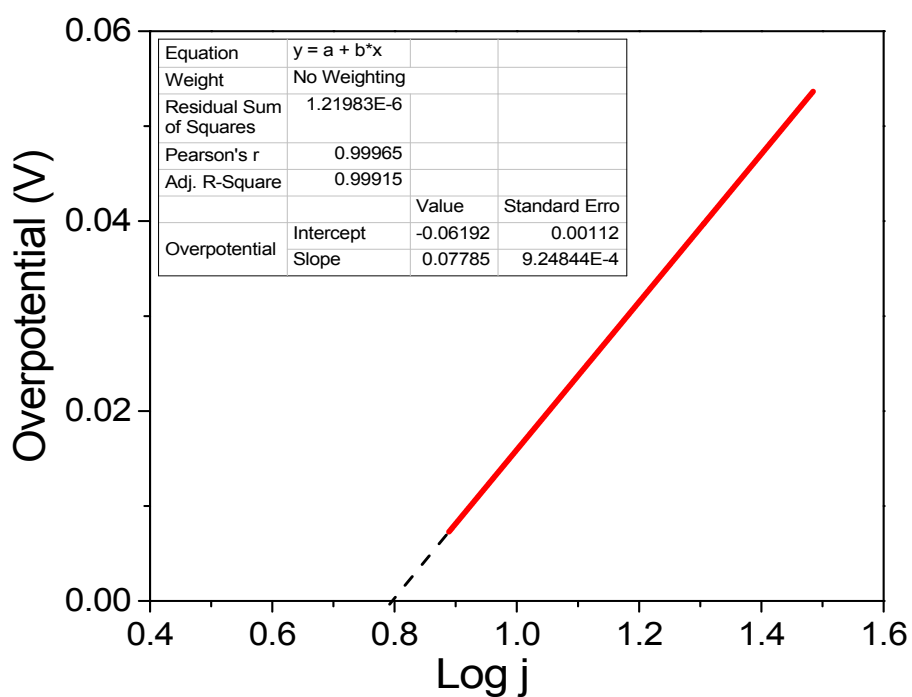

**Fig. S10** Tafel plot of NiAg<sub>0.4</sub> 3DPNC to evaluate the exchange current density. Exchange current density was computed from the Tafel equation.

The exchange current density of the NiAg<sub>0.4</sub> 3DPNC based on the geometric surface area was computed from the Tafel equation as shown below:

$$\eta = -0.062 + 0.077 \log j$$

$$0 = -0.062 + 0.077 \log j$$

$$\text{Log } j = 0.8052$$

$$j_{0\text{geometric}} = 6.3856 \text{ mA cm}^{-2}_{\text{geometric}}$$

$$j_{0(\text{ECSA})} = 6.3856/125 \text{ mA cm}^{-2}_{(\text{ECSA})}$$

$$j_{0(\text{ECSA})} = 5.10 * 10^{-5} \text{ A cm}^{-2}_{(\text{ECSA})}$$

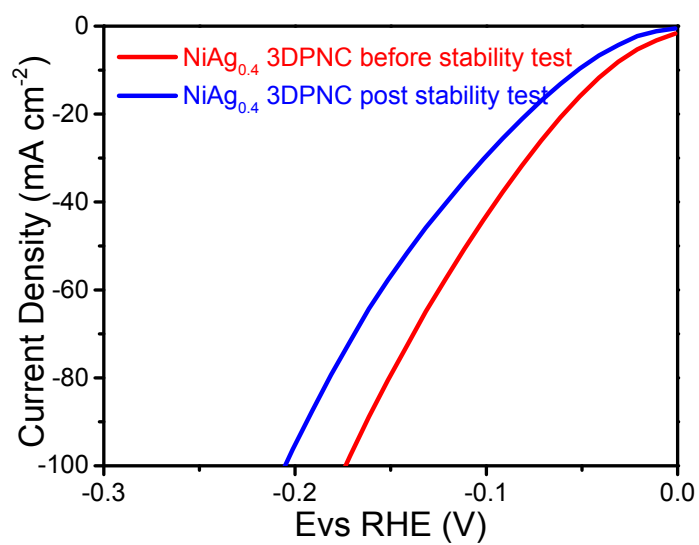

**Fig. S11** Comparison of HER polarization curve of NiAg<sub>0.4</sub> 3DPNC after 80 hours chronoamperometry test with the initial catalyst.

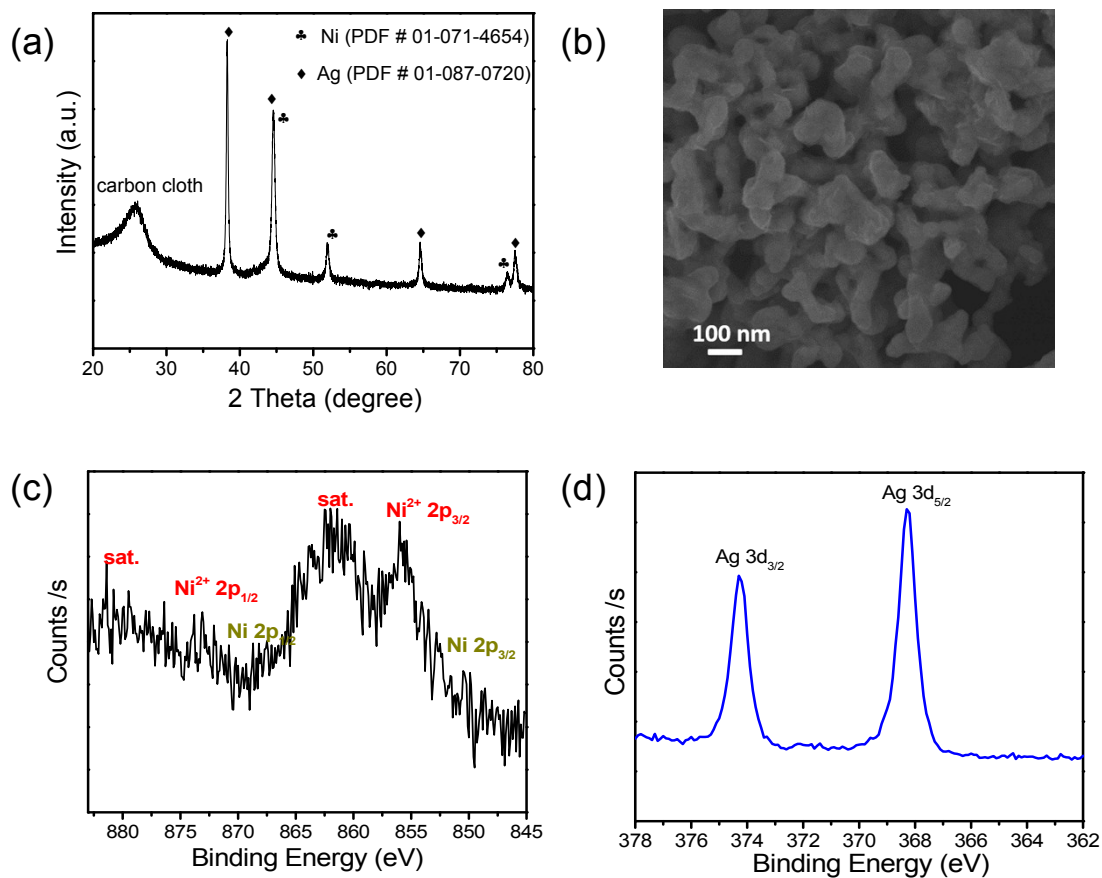

**Fig. S12** (a) XRD pattern of NiAg<sub>0.4</sub> 3DPNC after 80 hours chronoamperometry test. (b) FESEM image of the NiAg<sub>0.4</sub> 3DPNC after chronoamperometry test. XPS spectra of NiAg<sub>0.4</sub> 3DPNC after 80 hours chronoamperometry test in the (c) Ni 2p region, (d) Ag 3d region.

**Table S1.** Inductive couple plasma- atomic emission spectroscopy results for the synthesized samples with different Ni/Ag ratios.

| Ni : Ag ratio in the precursor solution | Expected molar concentration from synthesis | Measured molar concentration from ICP-OES | Expected molar concentration from synthesis | Measured molar concentration from ICP-OES | Sample name in the report                             |
|-----------------------------------------|---------------------------------------------|-------------------------------------------|---------------------------------------------|-------------------------------------------|-------------------------------------------------------|
|                                         | Ni (%)                                      | Ni (%)                                    | Ag (%)                                      | Ag (%)                                    |                                                       |
| 1 : 0.1                                 | 90.9                                        | 88.43019                                  | 9.1                                         | 11.56981                                  | NiAg <sub>0.13</sub> 3DPNC                            |
| 1 : 0.2                                 | 83                                          | 80.20356                                  | 17                                          | 19.79644                                  | NiAg <sub>0.25</sub> 3DPNC                            |
| 1 : 0.3                                 | 76.9                                        | 74.63433                                  | 23.1                                        | 25.36567                                  | NiAg <sub>0.34</sub> 3DPNC                            |
| 1 : 0.4                                 | 71.5                                        | 71.89                                     | 28.5                                        | 28.11                                     | NiAg <sub>0.4</sub> 3DPNC                             |
| 1 : 0.5                                 | 66.67                                       | 69.57572                                  | 33.33                                       | 30.42428                                  | NiAg <sub>0.44</sub> 3DPNC                            |
| 1 : 0.6                                 | 62.5                                        | 62.55256                                  | 37.5                                        | 37.44744                                  | NiAg <sub>0.6</sub> 3DPNC                             |
| 1 : 0.8                                 | 55.55                                       | 51.37111                                  | 44.45                                       | 48.62889                                  | NiAg <sub>0.95</sub> 3DPNC                            |
| 1 : 2                                   | 33.33                                       | 26.63245                                  | 66.67                                       | 73.36755                                  | NiAg <sub>2.75</sub> 3DPNC                            |
| 1 : 3                                   | 25                                          | 18.4579                                   | 75                                          | 81.5421                                   | NiAg <sub>4.42</sub> 3DPNC                            |
|                                         |                                             | 68.5                                      |                                             | 31.5                                      | NiAg <sub>0.4</sub> 3DPNC Post chronoamperometry test |

**Table S2.** Roughness factor values for different catalysts which was evaluated from the double layer capacitance.

| Catalyst                  | C <sub>dl</sub> (mF cm <sup>-2</sup> ) | Roughness factor (cm <sup>2</sup> per cm <sup>2</sup> <sub>(geometric)</sub> ) |
|---------------------------|----------------------------------------|--------------------------------------------------------------------------------|
| Ni 3DPNC                  | 7                                      | 175                                                                            |
| Ag NPs                    | 12.8                                   | 320                                                                            |
| Pt/C                      | 20.4738 mC cm <sup>-2</sup>            | 97.5                                                                           |
| NiAg <sub>0.4</sub> 3DPNC | 4.9                                    | 125                                                                            |

**Table S3.** HER activity of the NiAg<sub>0.4</sub>3DPNC in comparison with other recently reported catalysts with good activity.

| Catalyst                                                                                                | HER overpotential (mV@mA cm <sup>-2</sup> ) | Tafel slope (mV dec <sup>-1</sup> ) | Electrolyte                          | Stability      | Reference |
|---------------------------------------------------------------------------------------------------------|---------------------------------------------|-------------------------------------|--------------------------------------|----------------|-----------|
| Boron doped RhFe alloy                                                                                  | 25 mV @ 10 mA cm <sup>-2</sup>              | 32                                  | 0.5 M H <sub>2</sub> SO <sub>4</sub> | 8 hours        | 1         |
| Ni <sub>20</sub> Fe <sub>20</sub> Mo <sub>10</sub> Co <sub>35</sub> Cr <sub>15</sub> high entropy alloy | 172 mV @ 10 mA cm <sup>-2</sup>             | 41                                  | 1 M KOH                              | 8 hours        | 2         |
| Pt <sub>3</sub> Ni <sub>3</sub> NWs                                                                     | 70 mV @ 19.8 mA cm <sup>-2</sup>            | NA                                  | 1 M KOH                              | 3 hours        | 3         |
| Micro-nano MoS <sub>2</sub> spheres                                                                     | 214 mV @ 10 mA cm <sup>-2</sup>             | 74                                  | 0.5 M H <sub>2</sub> SO <sub>4</sub> | 24 hours       | 4         |
| Pt <sub>3</sub> Co nanoparticles                                                                        | 32.6 mV @ 10 mA cm <sup>-2</sup>            | 28.6                                | 0.5 M H <sub>2</sub> SO <sub>4</sub> | 5000 CV cycles | 5         |
| np-CoP <sub>3</sub> on Ti mesh                                                                          | 76 mV @ 10 mA cm <sup>-2</sup>              | 50                                  | 1 M KOH                              | 60 hours       | 6         |
| PtCo–Co/TiM                                                                                             | 70 mV @ 46.5 mA cm <sup>-2</sup>            | 35                                  | 1 M KOH                              | 50 hours       | 7         |
| Fe <sub>1.89</sub> Mo <sub>4.11</sub> O <sub>7</sub> /MoO <sub>2</sub>                                  | 197 mV @10 mA cm <sup>-2</sup>              | 79                                  | 1 M KOH                              | 1000 CV cycles | 8         |
| V-doped Ni <sub>3</sub> S <sub>2</sub> Nanowires on Ni foam                                             | 68 mV @ 10 mA cm <sup>-2</sup>              | 112                                 | 1 M KOH                              | 7000 cycles    | 9         |

---

|                                |                                          |             |                                                                                            |                                                        |                  |
|--------------------------------|------------------------------------------|-------------|--------------------------------------------------------------------------------------------|--------------------------------------------------------|------------------|
| CrOx/Ni-Cu                     | 48 mV @ 10<br>mA cm <sup>-2</sup>        | 64          | KH <sub>2</sub> PO <sub>4</sub> +<br>K <sub>2</sub> HPO <sub>4</sub><br>buffer (pH =<br>7) | 24 hours                                               | 10               |
| FeP<br>nanoparticles           | 154 mV @ 10<br>mA cm <sup>-2</sup>       | 65          | 0.5 M H <sub>2</sub> SO <sub>4</sub>                                                       | 1.66<br>hours                                          | 11               |
| IrAg nanotubes                 | 20 mV @ 10<br>mA cm <sup>-2</sup>        | 61.1        | 0.5 M H <sub>2</sub> SO <sub>4</sub>                                                       | 6 hours                                                | 12               |
| <b>NiAg<sub>0.4</sub>3DPNC</b> | <b>40 mV @ 10<br/>mA cm<sup>-2</sup></b> | <b>39.1</b> | <b>1 M KOH</b>                                                                             | <b>80<br/>hours<br/>and<br/>5000<br/>CV<br/>cycles</b> | <b>This work</b> |

---

## References

- 1 L. Zhang, J. Lu, S. Yin, L. Luo, S. Jing, A. Brouzgou, J. Chen, P. K. Shen and P. Tsiakaras, *App. Catal. B: Envir.*, 2018, **230**, 58-64.
- 2 G. Zhang, K. Ming, J. Kang, Q. Huang, Z. Zhang, X. Zheng and X. Bi, *Electrochim. Acta*, 2018, **279**, 19-23.
- 3 P. Wang, K. Jiang, G. Wang, J. Yao and X. Huang, *Angew. Chem.*, 2016, **55**, 12859-12863.
- 4 B. Guo, K. Yu, H. Li, H. Song, Y. Zhang, X. Lei, H. Fu, Y. Tan and Z. Zhu, *ACS App. Mater. Interfaces*, 2016, **8**, 5517-5525.
- 5 Z. Cheng, X. Geng, L. Chen, C. Zhang, H. Huang, S. Tang and Y. Du, *J. Mater. Sci.*, 2018, **53**, 12399-12406.
- 6 Y. Ji, L. Yang, X. Ren, G. Cui, X. Xiong and X. Sun, *ACS Sustain. Chem. Eng.*, 2018, **6**, 11186-11189.
- 7 Z. Wang, X. Ren, Y. Luo, L. Wang, G. Cui, F. Xie, H. Wang, Y. Xie and X. Sun, *Nanoscale*, 2018, **10**, 12302-12307.
- 8 Z. Hao, S. Yang, J. Niu, Z. Fang, L. Liu, Q. Dong, S. Song and Y. Zhao, *Chem. Sci.*, 2018, **9**, 5640-5645.
- 9 Y. Qu, M. Yang, J. Chai, Z. Tang, M. Shao, C. T. Kwok, M. Yang, Z. Wang, D. Chua, S. Wang, Z. Lu and H. Pan, *ACS Appl. Mater. Interfaces*, 2017, **9**, 5959-5967.
- 10 C.-T. Dinh, A. Jain, F. P. G. de Arquer, P. De Luna, J. Li, N. Wang, X. Zheng, J. Cai, B. Z. Gregory, O. Voznyy, B. Zhang, M. Liu, D. Sinton, E. J. Crumlin and E. H. Sargent, *Nat. Energy*, 2018, **4**, 107-114.
- 11 L. Tian, X. Yan and X. Chen, *ACS Catal.*, 2016, **6**, 5441-5448.
- 12 M. Zhu, Q. Shao, Y. Qian and X. Huang, *Nano Energy*, 2019, **56**, 330-337.
